# Supplementary material for: Molecular Beacon for Detection miRNA-21 as a Biomarker of Lung Cancer
Source: MDPI journal article supplement (doi:10.3390/ijms23063330), 2022-03-19
Supplement: s1 [file s1]

## Supporting Information

### Molecular Beacon for detection miRNA-21 as a biomarker of lung cancer

Daniela Alexandre<sup>1,†</sup>, Bernardo Teixeira<sup>1,†</sup>, André Rico<sup>1</sup>, Salete Valente<sup>2</sup>, Ana Craveiro<sup>2</sup>, Pedro V. Baptista<sup>3,4</sup> and Carla Cruz <sup>1,\*</sup>

<sup>1</sup>CICS-UBI - Centro de Investigação em Ciências da Saúde, Universidade da Beira Interior, Av. Infante D. 5 Henrique, Covilhã, Portugal;

<sup>2</sup>Serviço de Pneumologia do Centro Hospitalar Universitário Cova da Beira (CHUCB), Covilhã, Portugal;

<sup>3</sup>UCIBIO, Department of Life Sciences, Faculdade de Ciências e Tecnologia, Universidade NOVA de Lisboa, 2829-516 Caparica, Portugal.

<sup>4</sup>i4HB, Associate Laboratory - Institute for Health and Bioeconomy, FCT-NOVA

\*Correspondence: Corresponding author email: [carlacruz@fcsaude.ubi.pt](mailto:carlacruz@fcsaude.ubi.pt)

<sup>†</sup>These authors contributed equally to this work.

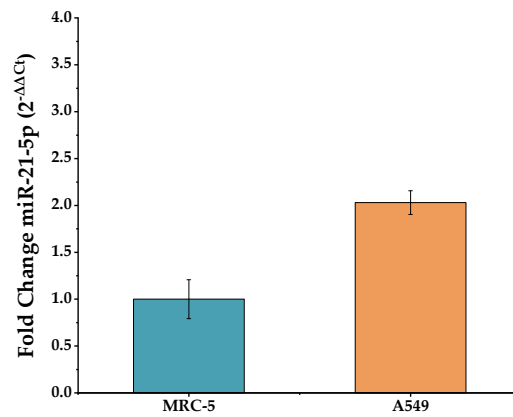

**Figure S1.** miRNA 21-5p relative expression in MRC-5 normal lung and A549 NSCLC cell lines. A549 miRNA expression was performed through RT-qPCR assays in duplicate, normalized, and standardized to MRC-5 control expression value 1 (mean  $\pm$  SD, n=5).

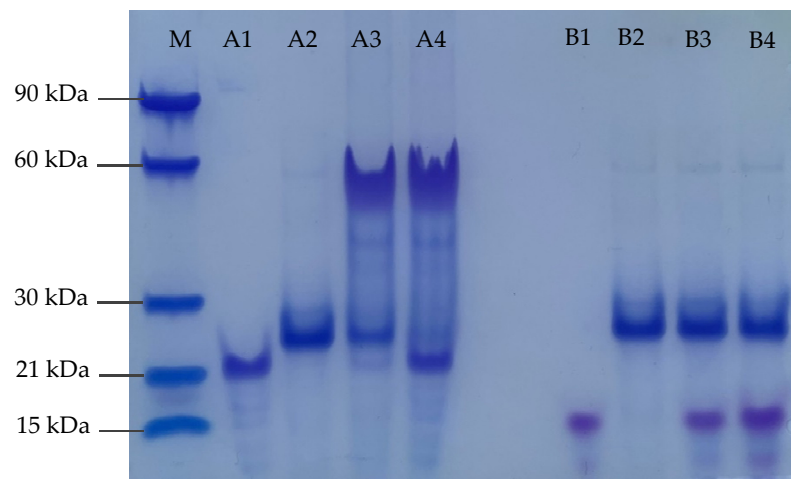

**Figure S2.** MB 21-5p hybridization native PAGE gel results with previous 41 °C incubation. M: Weight marker; A: MB 21-5p + specific miR-21-5p set; B: MB 21-5p + non-specific miR-21-3p set; 1: miRNA (5  $\mu$ M); 2: MB 21-5p (5  $\mu$ M); 3: MB 21-5p (5  $\mu$ M) + miRNA (5  $\mu$ M); 4: MB 21-5p (5  $\mu$ M) + miRNA (10  $\mu$ M).

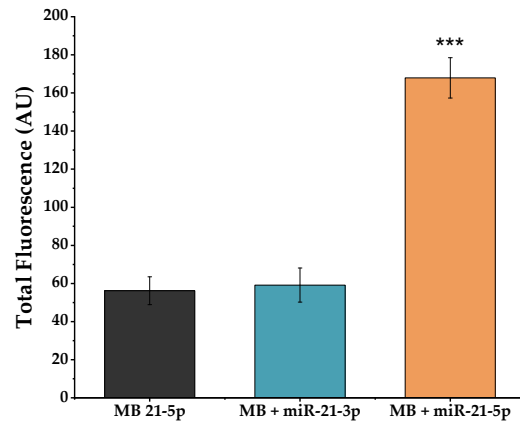

**Figure S3.** MB 21-5p hybridization with miR-21-5p and non-specific miR-21-3p (mean  $\pm$  SD, \*\*\* $p$  < 0.001). Fluorescence is represented in total values measured in the plate reader (n=3).

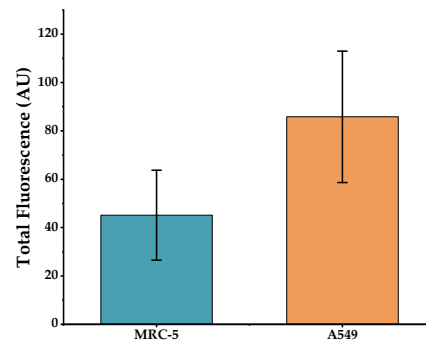

**Figure S4.** MB 21-5p MRC-5 and A549 RNA hybridization assays (mean  $\pm$  SD). Fluorescence data is represented with MB 21-5p basal fluorescence discounted (n=3).

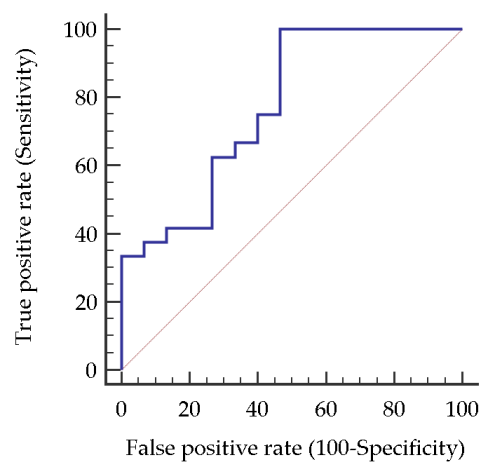

**Figure S5.** ROC curve analysis on the developed MB 21-5p hybridization approach for miR-21-5p detection in RNA from healthy control and NSCLC PBMCs.

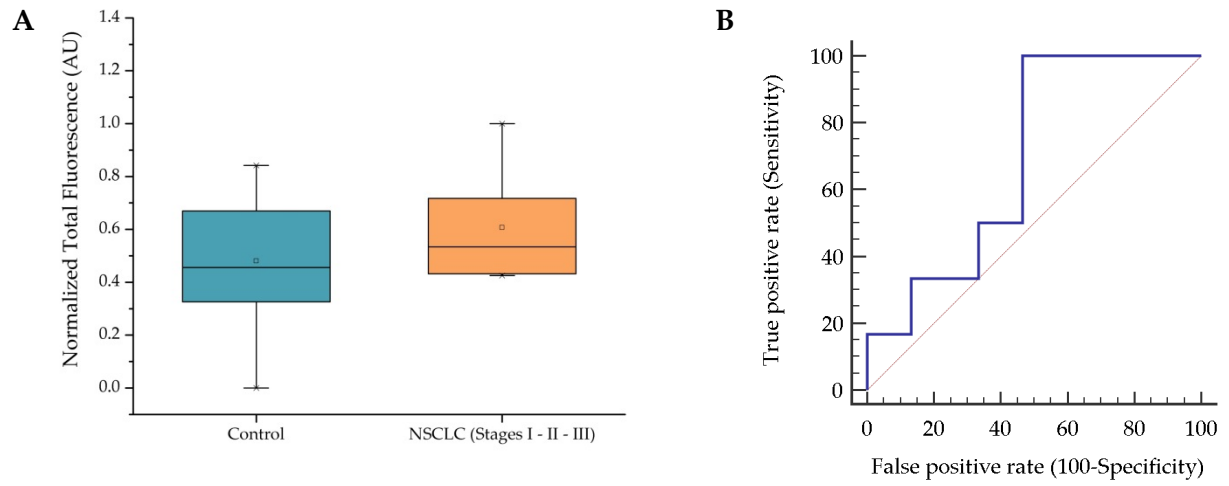

**Figure S6. A.** MB 21-5p hybridization studies with healthy and NSCLC PBMCs in stages I, II, and III. (mean  $\pm$  SD). Data corrected for basal fluorescence and normalized to [0, 1]. Samples in study comprised: healthy control group (n=15); NSCLC stages I, II and III group (n=6), with NSCLC stage I (n=1), NSCLC stage II (n=2), and NSCLC stage III (n=3). **B.** ROC curve analysis on the developed MB 21-5p hybridization approach for miR-21-5p detection for healthy control and NSCLC PBMCs in stages I, II, and III.

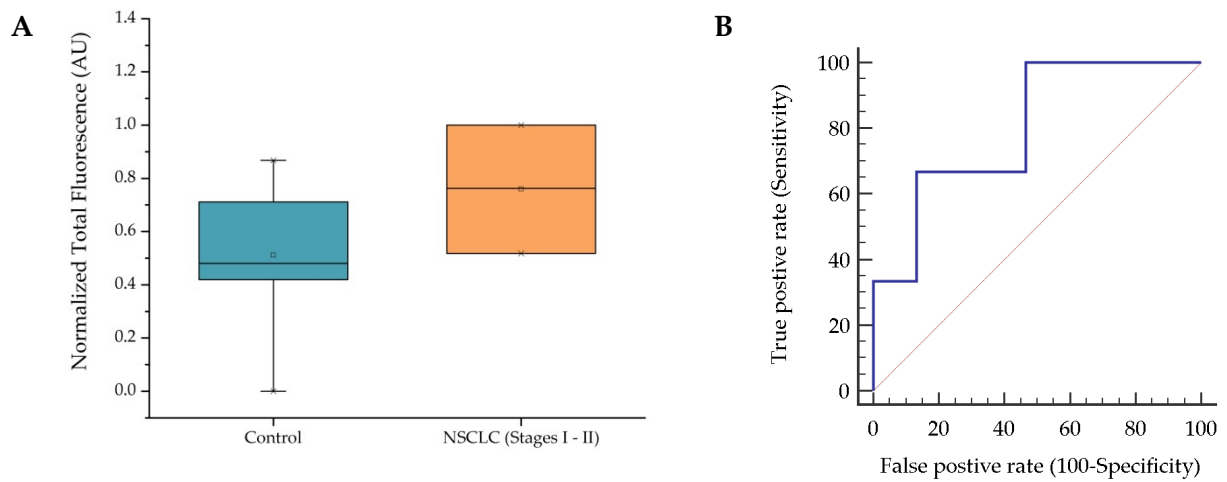

**Figure S7. A.** MB 21-5p hybridization studies with healthy and NSCLC PBMCs in stages I and II. (mean  $\pm$  SD). Data corrected for basal fluorescence and normalized to [0, 1]. Samples in study comprised: healthy control group (n=15); NSCLC stages I and II group (n=3), with NSCLC stage I (n=1) and NSCLC stage II (n=2). **B.** ROC curve analysis on the developed MB 21-5p hybridization approach for miR-21-5p detection for healthy control and NSCLC PBMCs in stages I and II.
